# Supplementary material for: TiO2–NGQD composite photocatalysts with switchable photocurrent response
Source: Royal Society of Chemistry journal article supplement (doi:10.1039/d2nr06587h), 2023-01-01
Supplement: d2nr06587h1.pdf [file d2nr06587h1.pdf]

Supplemental

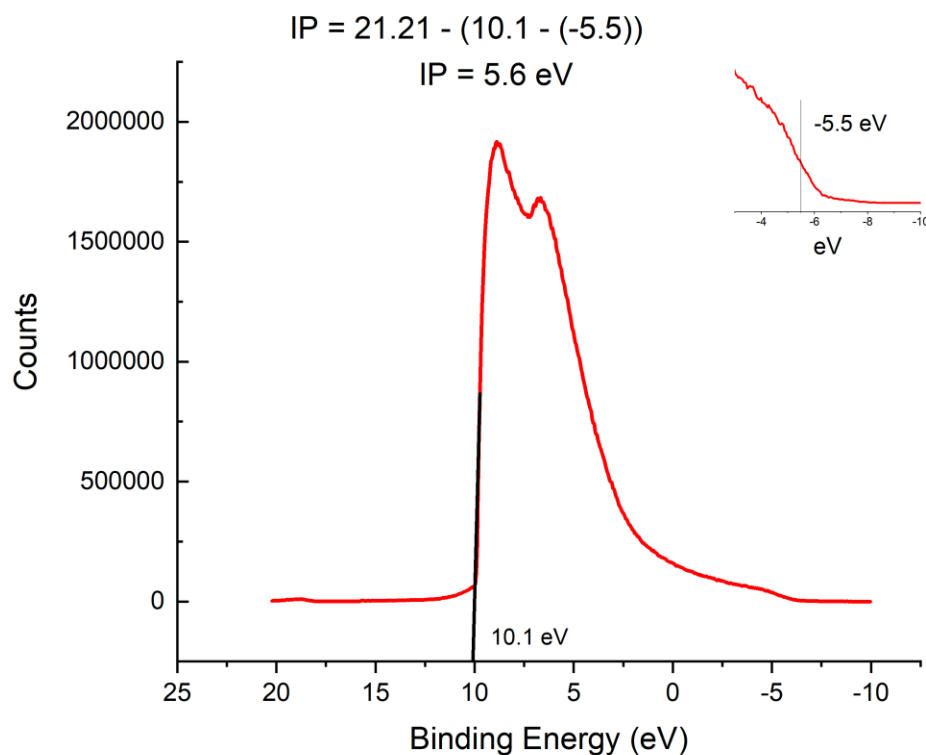

**Supplemental S1: UPS of NGQDs under 10V bias. The ionization potential is calculated via the secondary electron cutoff (10.1 eV) and the valence band offset (-5.5 eV) utilizing the known energy of the He (I) light source.**

**A**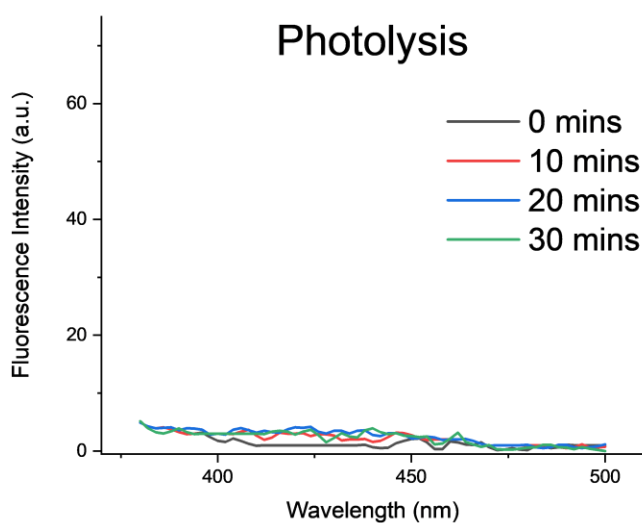**B**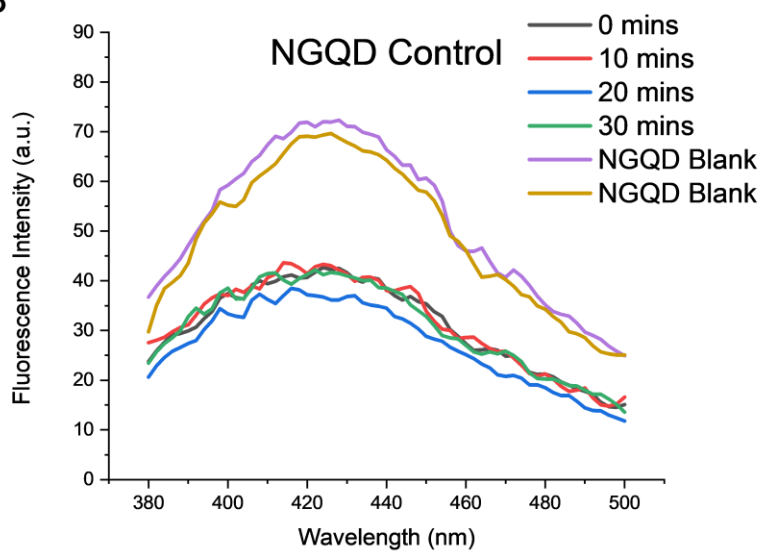

**Supplemental S2: Terephthalic acid radical capture fluorescence spectra of a) photolysis (no photocatalyst) and b) NGQD control (NGQD + Terephthalic acid) and NGQD blank (no Terephthalic acid present)**

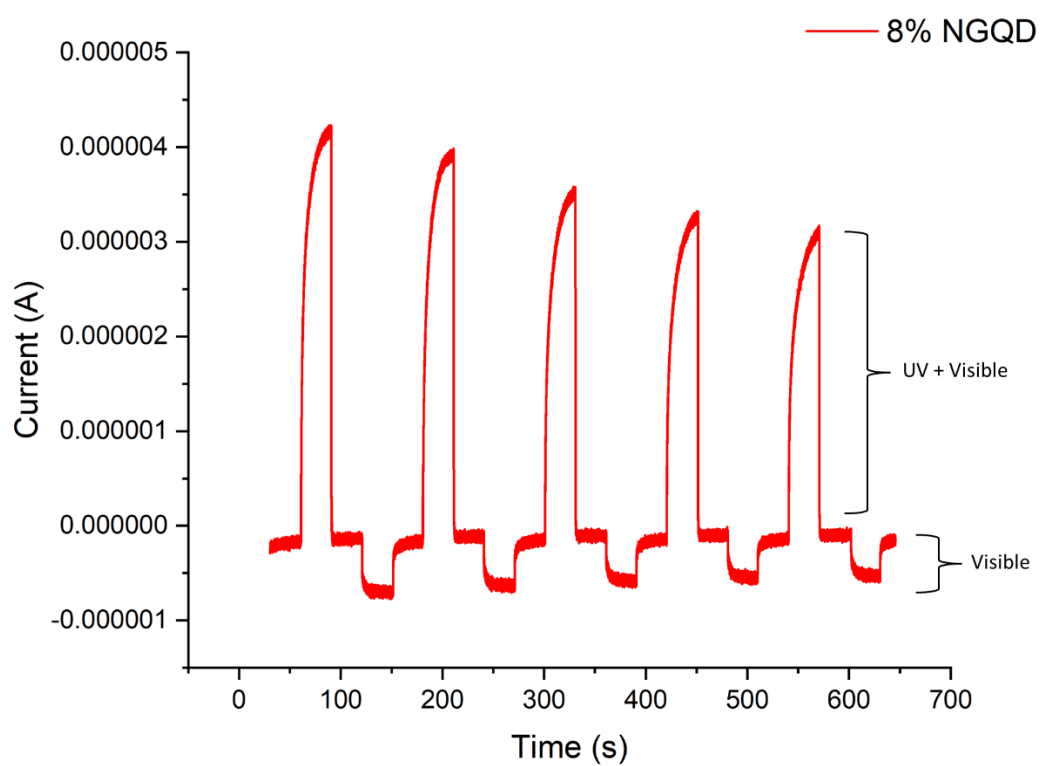

**Supplemental S3: Photocurrent response of 8% NGQD thin film under alternating full spectrum / visible irradiation showing anodic to cathodic current switching**

#### Supplemental S4: Phenol concentration determination via $^1\text{H}$ NMR

To obtain concentration:

Experimental fids were analyzed using MestReNova. Automatic baseline correction using Berstein Polynomial fit. Peak positions were shifted so  $\text{H}_2\text{O}$  residual peak centered at 4.8 ppm. Manual phase correction performed using maleic acid shoulder peaks as a guide. Absolute peak integrations were taken for maleic acid, downfield ( $\text{H}_\text{B}$ ) and upfield ( $\text{H}_\text{A}$  &  $\text{H}_\text{C}$ ) phenol peaks. Maleic Acid was used as an internal standard to calculate a conversion factor between the absolute integration of NMR peaks and the number of protons contributing. The conversion factor was calculated for each timepoint using the following equation.

$$\text{Internal Conversion Factor} = \frac{\text{Integration of Maleic Acid Peaks}}{\text{Concentration of Maleic Acid} * n_{\text{Maleic Acid protons}}}$$

$n_{\text{Maleic Acid protons}}$  was taken as 2 for all samples and concentration was taken as 4.54 mg/mL per methods section. Phenol concentrations were calculated using the following formula:

$$C_{\text{Phenol}} = \frac{\text{Phenol Peak Integration}}{\text{Conversion Factor} * n_{\text{Phenol protons}}}$$

$n_{\text{Phenol protons}}$  was taken to be 2 for downfield peaks and 3 for upfield peaks.

Time series of 4% NGQD full spectrum:

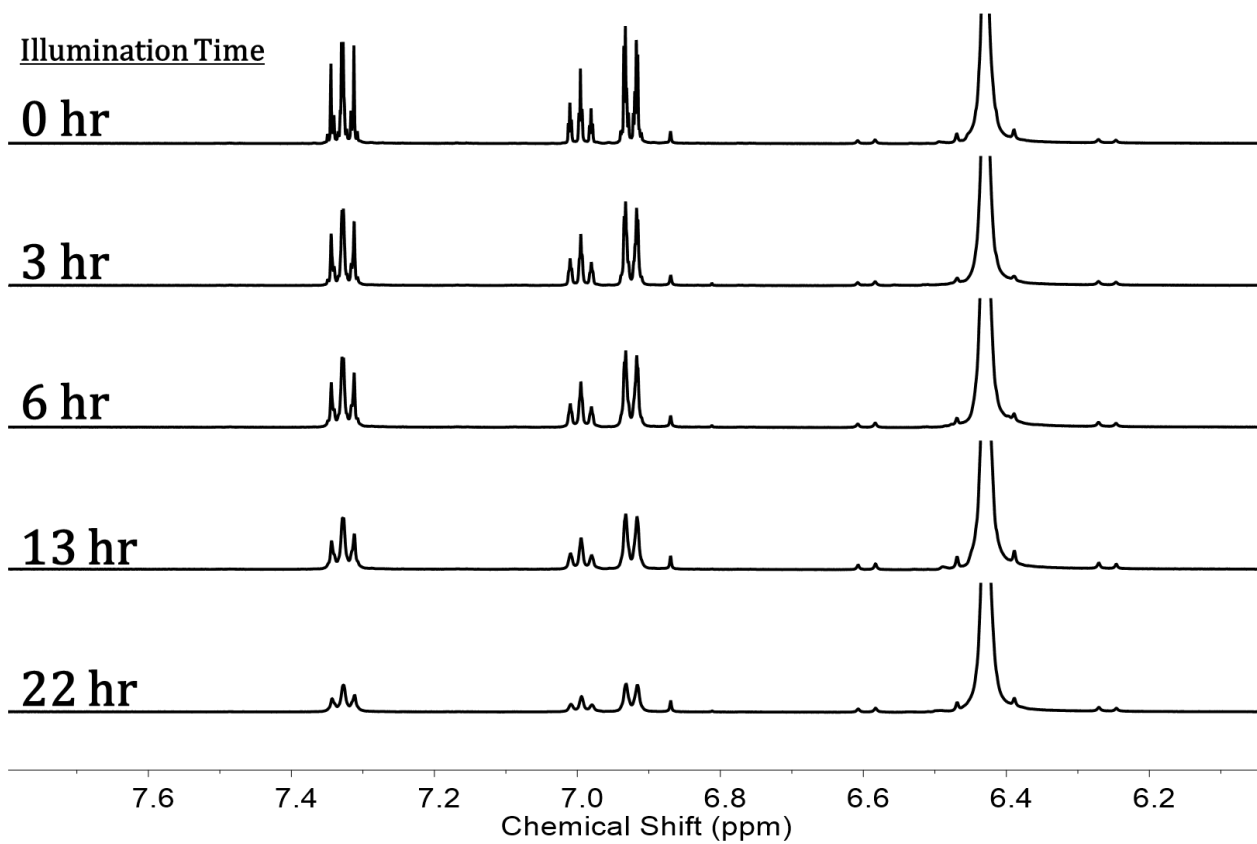

Full Spectrum at Time 0 for 4% NGQD:

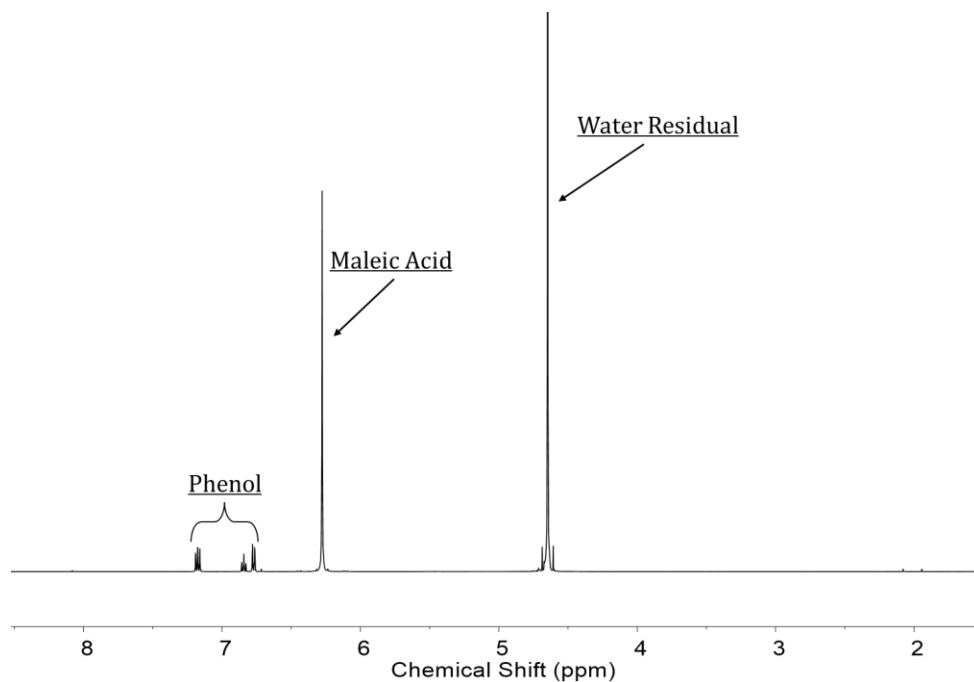

**Aromatic Region + Phenol Peak Assignments in 4% NGQD at Time 3 hr under full spectrum illumination:**

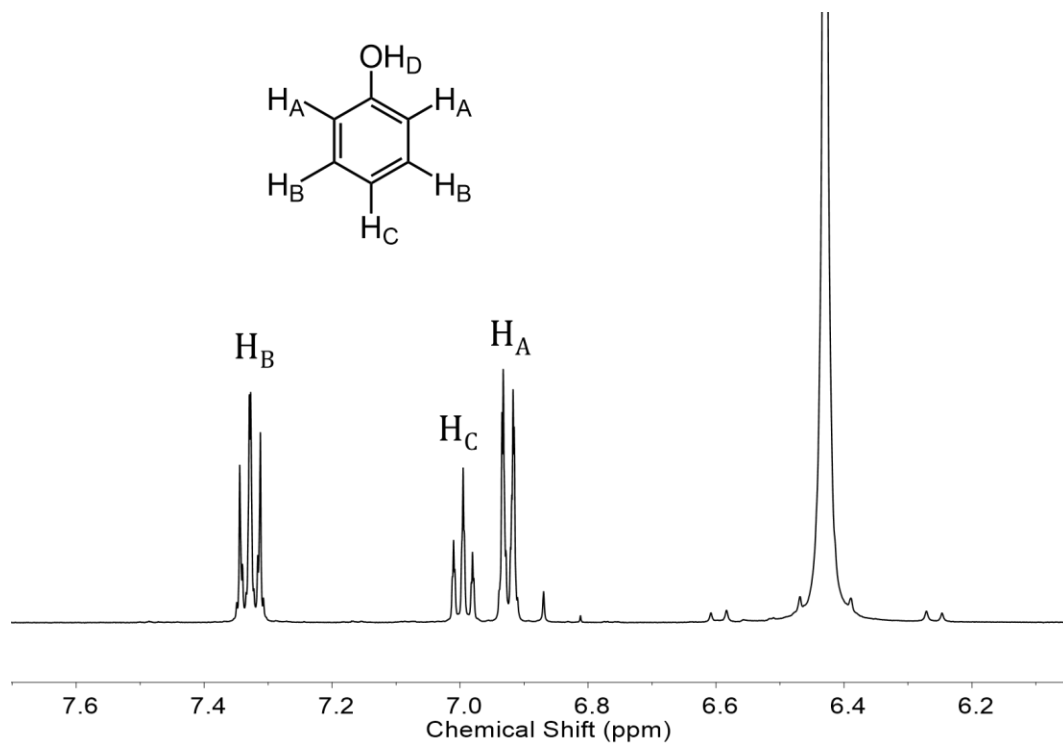

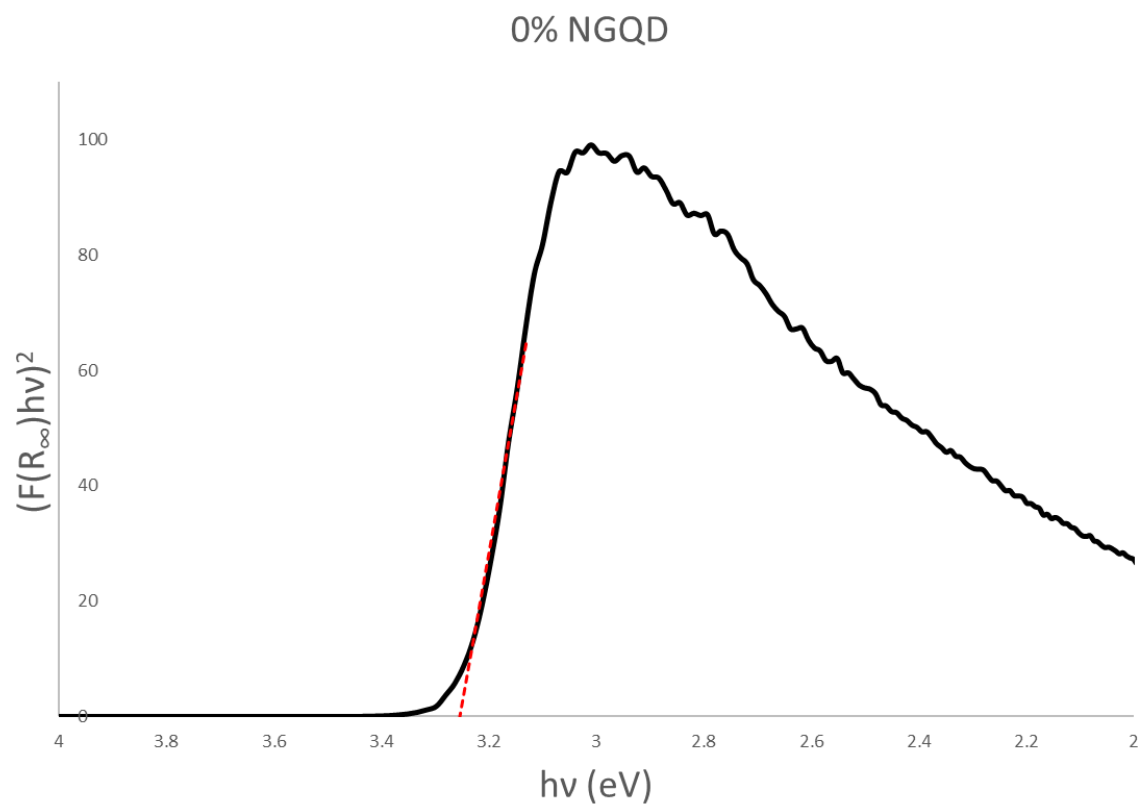

Supplemental S5 Tauc plot for 0% NGQD
